# Supplementary material for: Incidence and properties of nanoscale defects in silicalite
Source: Royal Society of Chemistry journal article supplement (doi:10.1039/b513582f), 2005-12-08

Perfect MFI: upper –viewed along [010]; lower viewed along [100]

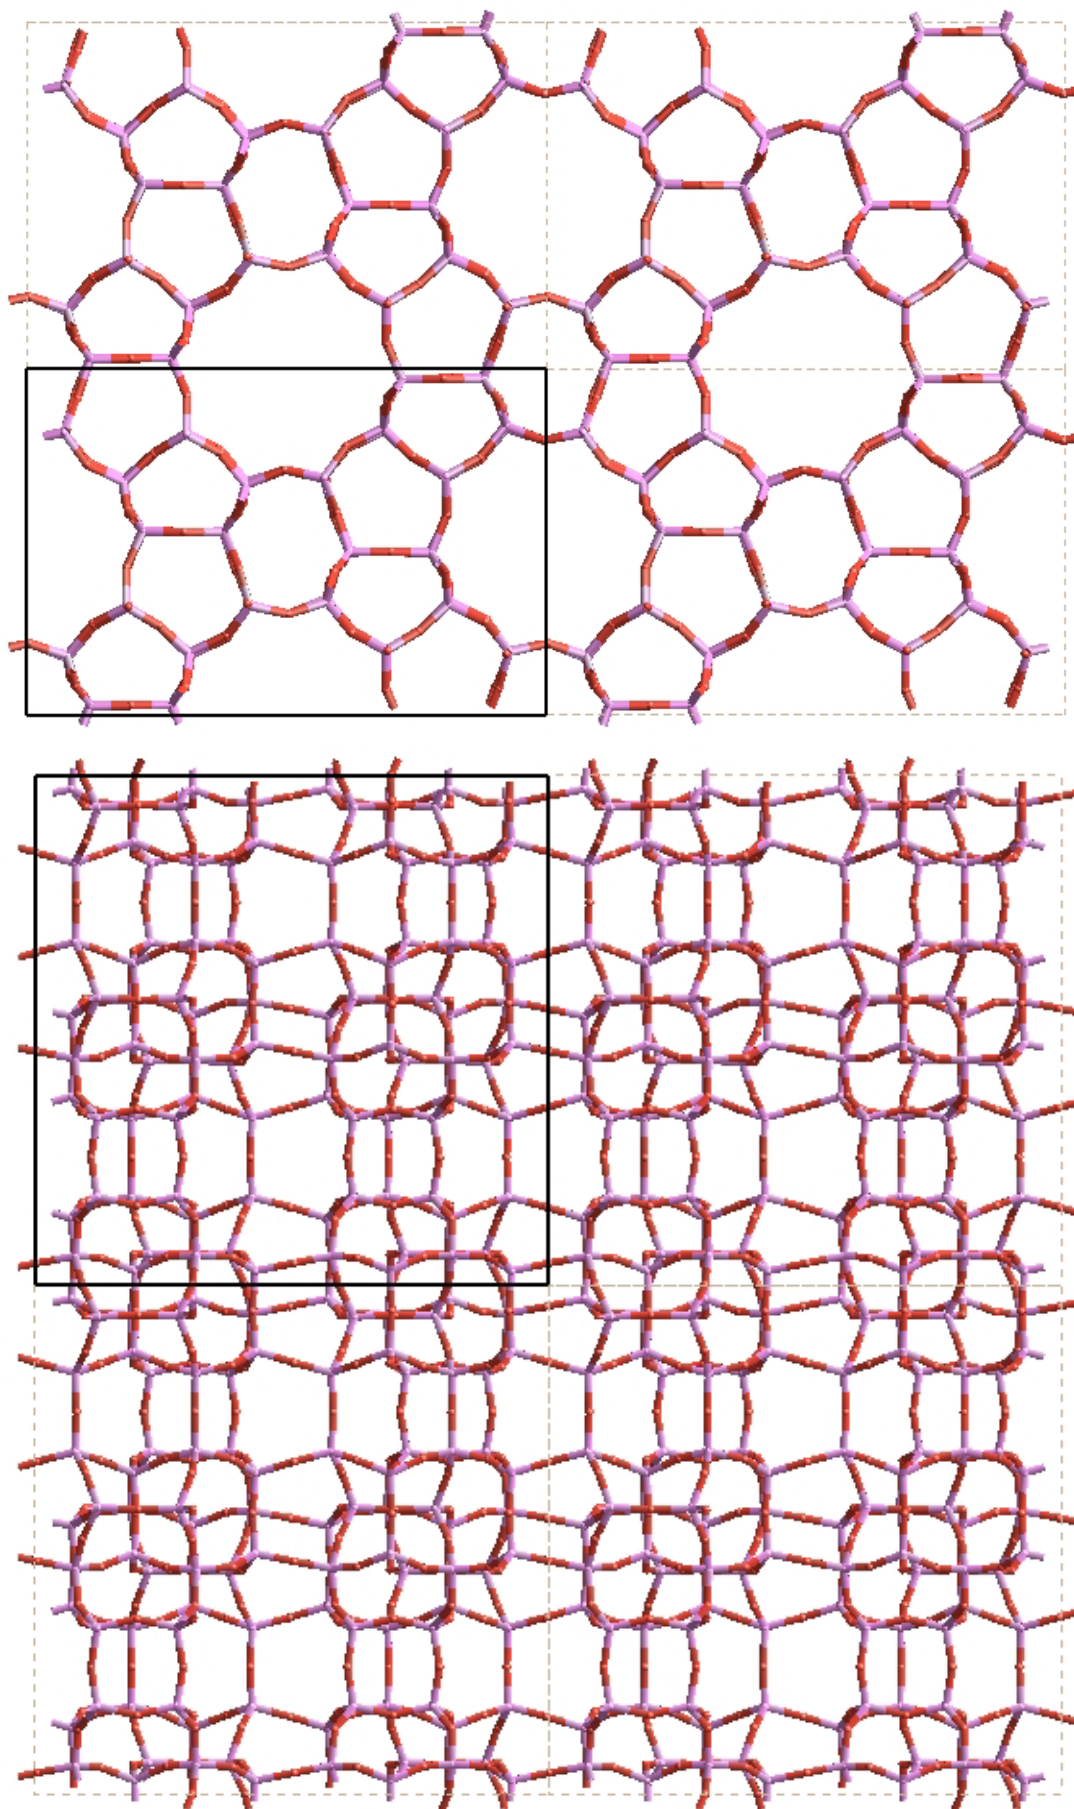

O defect: upper –viewed along [010]; lower viewed along [100]

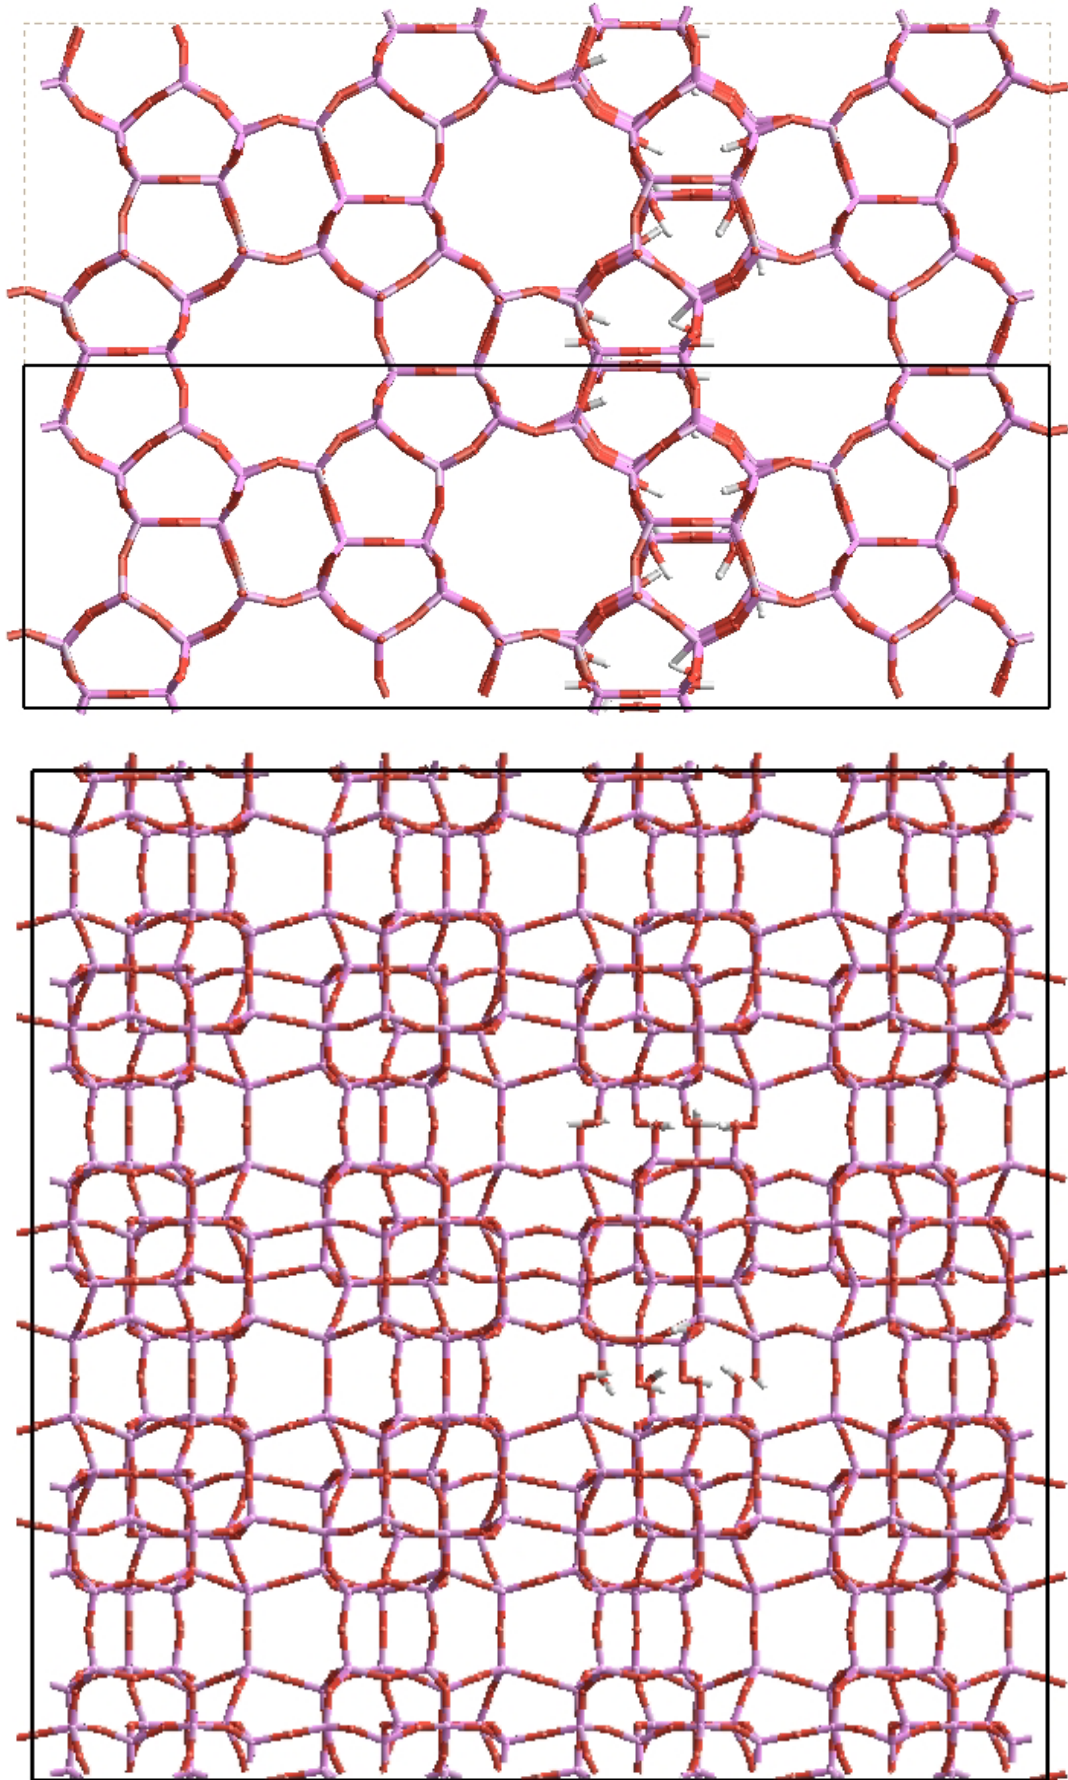

M defect: upper –viewed along [010]; lower viewed along [100]

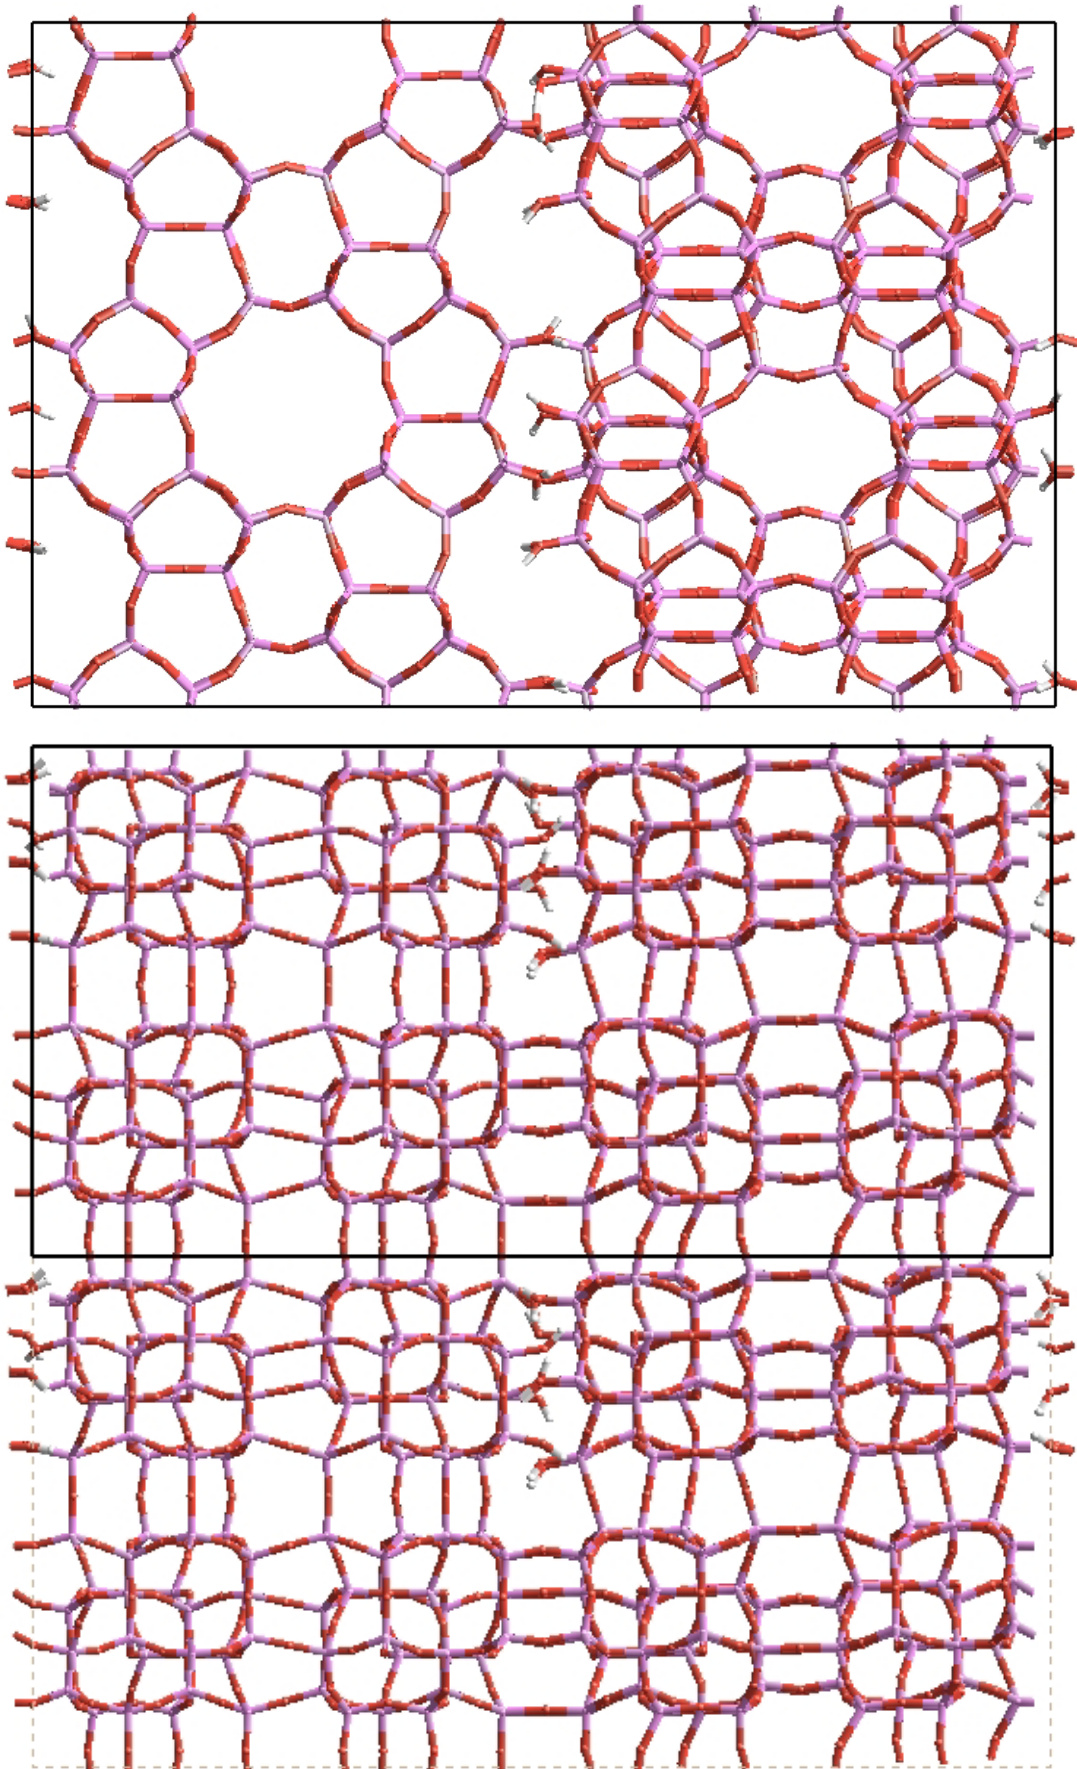

R defect: upper –viewed along  $[010]$ ; lower viewed along  $[100]$

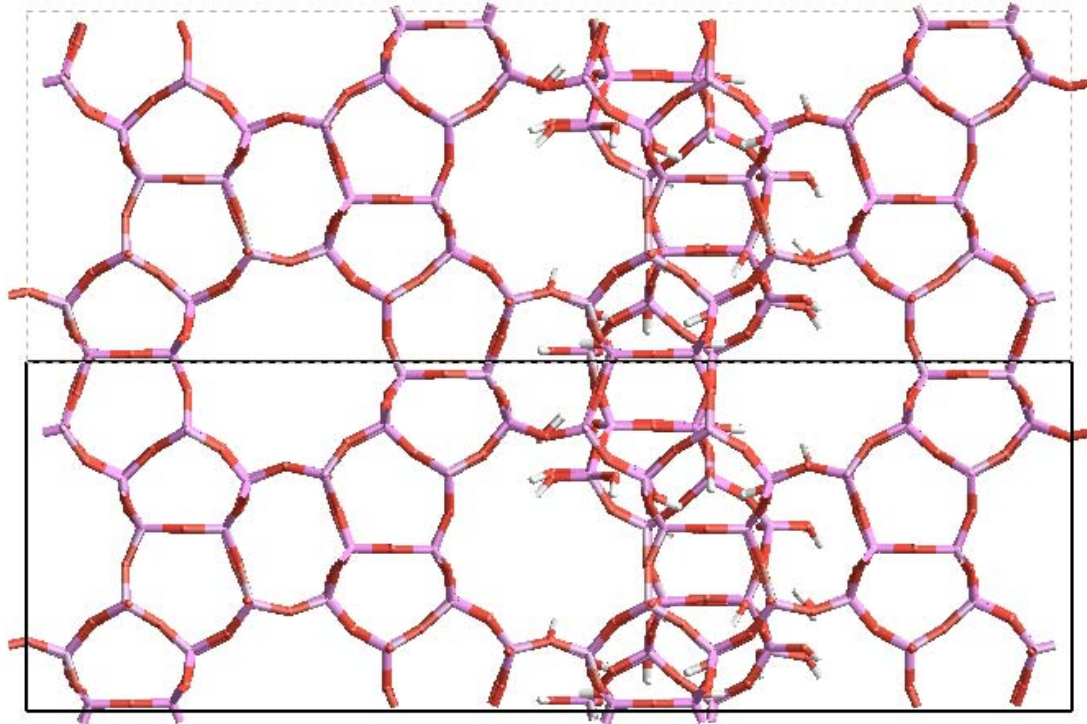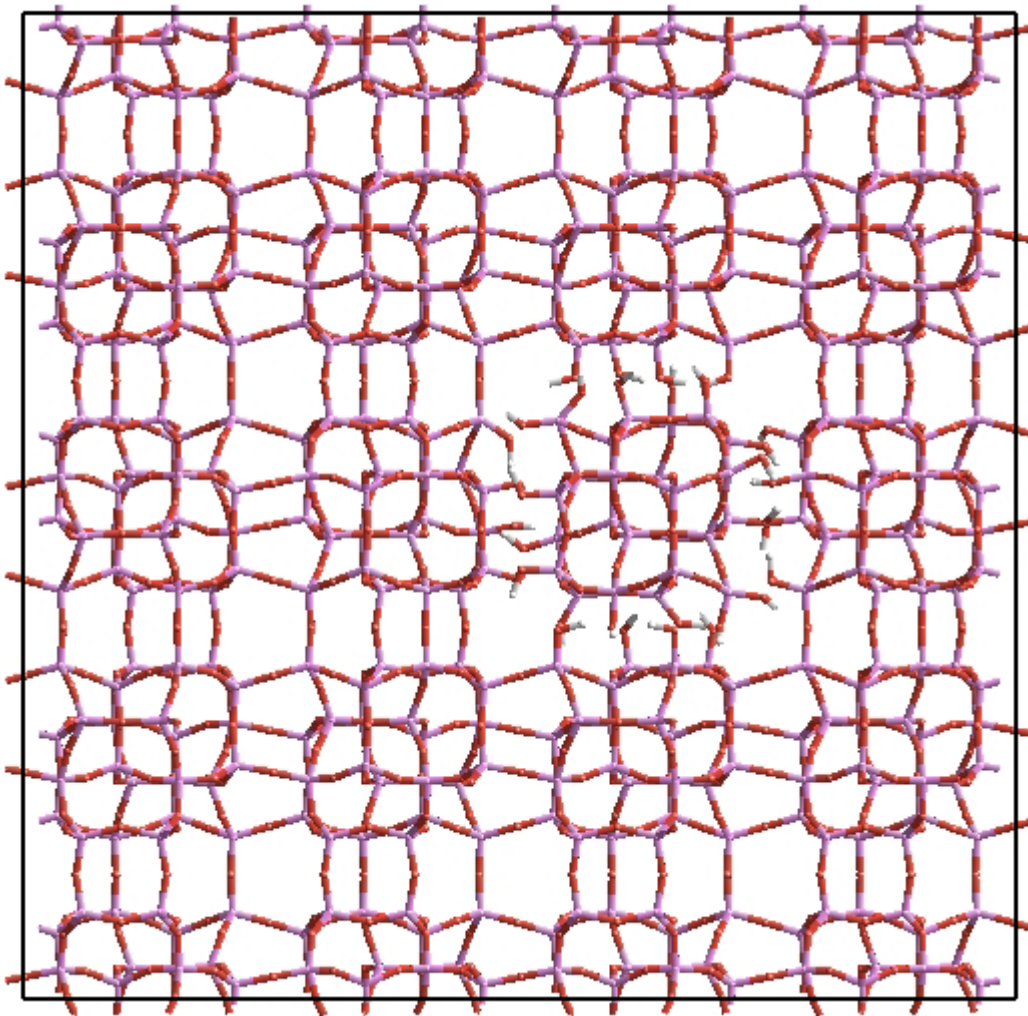

Supplement: b513582f.pdf [file b513582f.pdf]
